# Supplementary material for: Conservation Genetics of the Critically Endangered Southern River Terrapin (Batagur affinis) in Malaysia: Genetic Diversity and Novel Subspecies Distribution Ranges
Source: MDPI journal article supplement (doi:10.3390/biology12040520), 2023-03-29

## Supplementary materials

**Fig. S1 (a)** Maximum Likelihood (ML) tree showing the relationship among D-loop haplotypes of *Batagur affinis*, *Batagur borneoensis* and *Dermochelys coriacea*. The number at each node represents the bootstrap value % based on 1000 pseudoreplication for the ML analysis. **(b)** Maximum Parsimony (MP) Tree showing the relationship between the D-loop haplotypes of *Batagur affinis*, *Batagur borneoensis* and *Dermochelys coriacea*. The number at each node represents the bootstrap value % based on 1000 pseudoreplication for the MP analysis.

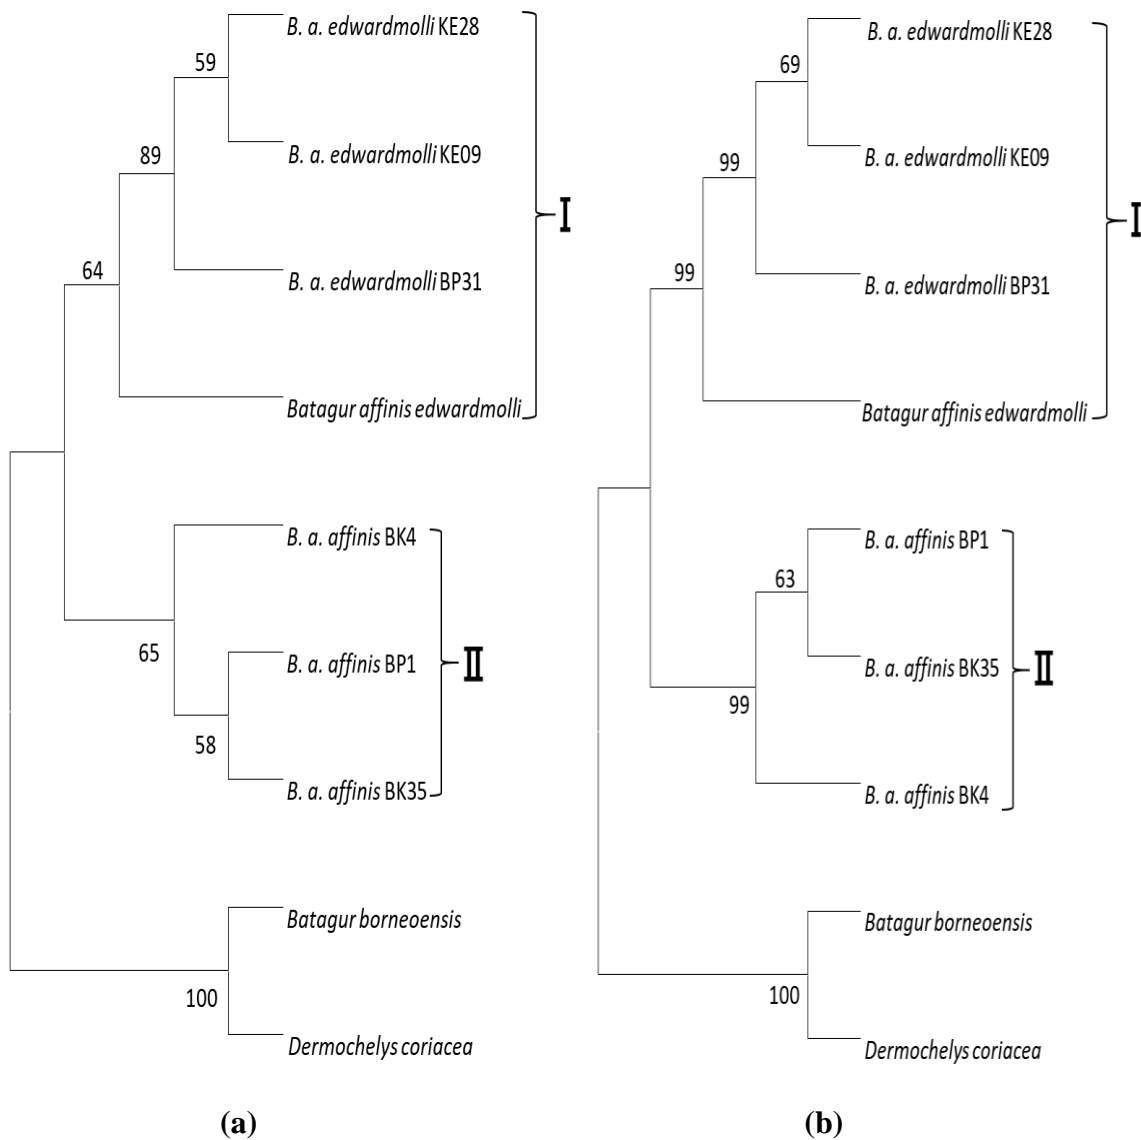

**Fig. S2** The plot of transition (X) and transversion ( $\Delta$ ) against divergence using the F84 distance method.

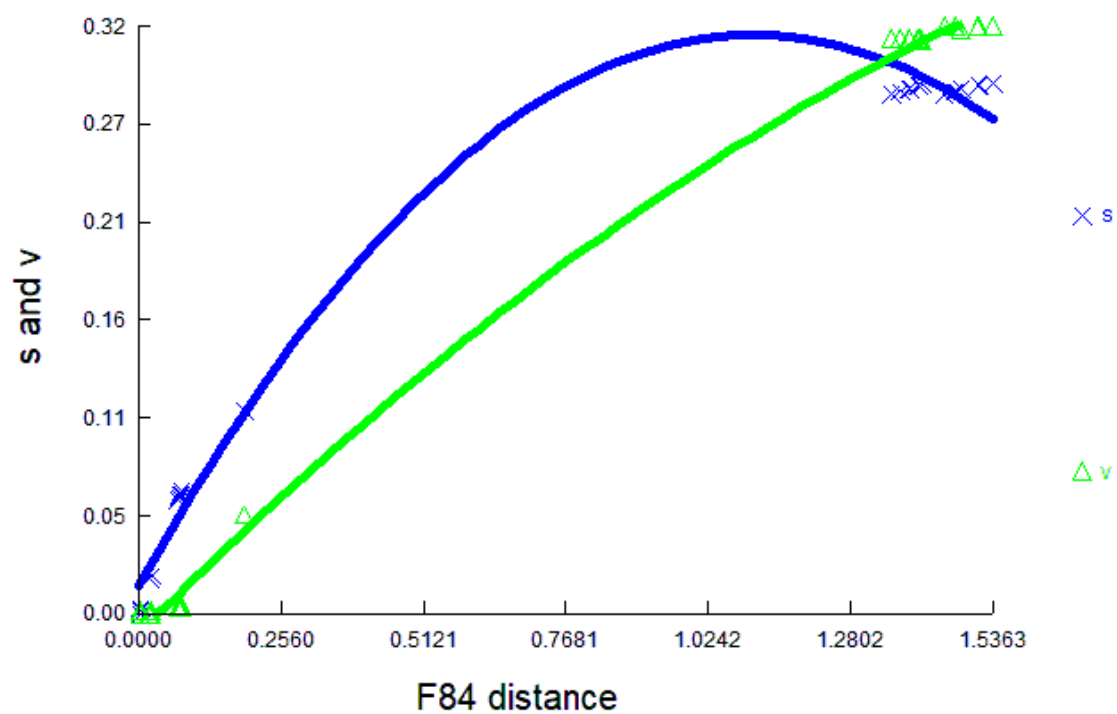

Supplement: s1 [file s1]
